## ***Cryptococcus neoformans* Chitin Synthase 3 (Chs3) Plays a Critical Role in Dampening Host Inflammatory Responses**

Camaron R. Hole<sup>a</sup>, Woei C. Lam<sup>a</sup>, Rajendra Upadhya<sup>a</sup>, and Jennifer K. Lodge<sup>a#</sup>

<sup>a</sup>Department of Molecular Microbiology, Washington University School of Medicine, St. Louis, MO, USA.

**Running Head:** Cryptococcal Chs3 impacts immune responses

#Address correspondence to Jennifer K. Lodge, [lodgejk@wustl.edu](mailto:lodgejk@wustl.edu)

1 **ABSTRACT:**

2       *Cryptococcus neoformans* infections are significant causes of morbidity and  
3 mortality among AIDS patients and the third most common invasive fungal infection in  
4 organ transplant recipients. One of the main interfaces between the fungus and the host  
5 is the fungal cell wall. The cryptococcal cell wall is unusual among human pathogenic  
6 fungi in that the chitin is predominantly deacetylated to chitosan. Chitosan deficient strains  
7 of *C. neoformans* were found to be avirulent and rapidly cleared from the murine lung.  
8 Moreover, infection with a chitosan deficient *C. neoformans* lacking three chitin  
9 deacetylases (*cda1Δ2Δ3Δ*) was found to confer protective immunity to a subsequent  
10 challenge with a virulent wild type counterpart. In addition to the chitin deacetylases, it  
11 was previously shown that chitin synthase 3 (Chs3) is also essential for chitin deacetylase  
12 mediated formation of chitosan. Mice inoculated with *chs3Δ* at a dose previously shown  
13 to induce protection with *cda1Δ2Δ3Δ* die within 36 hours after installation of the organism.  
14 Mortality was not dependent on viable fungi as mice inoculated with heat-killed  
15 preparation of *chs3Δ* died at the same rate as mice inoculated with live *chs3Δ*, suggesting  
16 the rapid onset of death was host mediated likely caused by an over exuberant immune  
17 response. Histology, cytokine profiling, and flow cytometry indicates a massive neutrophil  
18 influx in the mice inoculated with *chs3Δ*. Mice depleted of neutrophils survived *chs3Δ*  
19 inoculation indicating that death was neutrophil mediated. Altogether, these studies lead  
20 us to conclude that Chs3, along with chitosan, plays critical roles in dampening  
21 cryptococcal induced host inflammatory responses.

22

23

24

25 **IMPORTANCE:**

26 *Cryptococcus neoformans* is the most common disseminated fungal pathogen in  
27 AIDS patients, resulting in ~200,000 deaths each year. There is a pressing need for new  
28 treatments for this infection, as current antifungal therapy is hampered by toxicity and/or  
29 the inability of the host's immune system to aid in resolution of the disease. An ideal target  
30 for new therapies is the fungal cell wall. The cryptococcal cell wall is different than many  
31 other pathogenic fungi in that it contains chitosan. Strains that have decreased chitosan  
32 are less pathogenic and strains that are deficient in chitosan are avirulent and can induce  
33 protective responses. In this study we investigated the host responses to *chs3Δ*, a  
34 chitosan-deficient strain, and found mice inoculated with *chs3Δ* all died within 36 hours  
35 and death was associated with an aberrant hyperinflammatory immune response driven  
36 by neutrophils, indicating that chitosan is critical in modulating the immune response to  
37 *Cryptococcus*.

38

39 **Introduction:**

40 *Cryptococcus neoformans* is a ubiquitous encapsulated fungal pathogen that  
41 causes pneumonia and meningitis in immunocompromised individuals. *C. neoformans* is  
42 the most common disseminated fungal pathogen in AIDS patients, with an estimated  
43 quarter million cases of cryptococcal meningitis each year resulting in ~200,000 deaths  
44 (1, 2) and remains the third most common invasive fungal infection in organ transplant  
45 recipients (3). Current antifungal therapy is often hampered by toxicity and/or the inability  
46 of the host's immune system to aid in resolution of the disease; treatment is further limited  
47 by drug cost and availability in the resource-limited settings (4). The acute mortality rate

48 of patients with cryptococcal meningitis is between 10-30% in medically-advanced  
49 countries (5, 6), and even with appropriate therapy at least one third of patients with  
50 cryptococcal meningitis will undergo mycologic and/or clinical failure (4). Patients that do  
51 recover can be left with profound neurological sequelae, highlighting the need for more  
52 effective therapies, and/or vaccines to combat cryptococcosis

53         One of the main interfaces between the fungus and the host is the fungal cell wall.  
54 Most fungal cell walls contain chitin, however, the cryptococcal cell wall is unusual in that  
55 the chitin is predominantly deacetylated to chitosan. Chitin is a homopolymer of  $\beta$ -1,4-  
56 linked *N*-acetylglucosamine (GlcNAc) and is one of the most abundant polymers in  
57 nature. Immunologically, chitin can induce allergy and strong Th2-type immune  
58 responses (7). Chitin is polymerized from cytoplasmic pools of UDP-GlcNAc by a multiple  
59 trans-membrane protein chitin synthase (CHS) and there are eight Chs's encoded in *C.*  
60 *neoformans* genome (8). Chitosan, the deacetylated form of chitin, is generally less  
61 abundant in nature than chitin, but is found in the cell wall of several fungal species  
62 depending on growth phase (8). Chitosan is not synthesized de novo but is generated  
63 from chitin through enzymatic conversion of GlcNAc to glucosamine by chitin  
64 deacetylases (CDAs) and *C. neoformans* makes three CDAs (9). Why *Cryptococcus*  
65 converts chitin to chitosan and what advantages this conversion provides to the organism  
66 are not well understood.

67         Deletion of a specific chitin synthase (CHS3), or deletion of all three chitin  
68 deacetylases causes a significant reduction in chitosan in the vegetative cell wall (9).  
69 These chitosan deficient strains of *C. neoformans* are avirulent and rapidly cleared from  
70 the murine lung (9). Moreover, infection with a chitosan deficient *C. neoformans* strain

71 lacking three chitin deacetylases (*cda1Δ2Δ3Δ*) was found to confer protective immunity  
72 to a subsequent challenge with a virulent wild type counterpart (10). These findings  
73 suggest that there is an altered host response to chitosan-deficient strains. Therefore, we  
74 wanted to determine the nature of host immune response to an infection with chitosan  
75 deficiency caused by the deletion of *C. neoformans* *CHS3* gene.

76 Surprisingly, we observed that all mice inoculated with chitosan-deficient *chs3Δ*  
77 died within 36 hours. Death was not dependent on live organism or the mouse  
78 background. We hypothesized that the rapid onset of mortality was likely due to an  
79 aberrant immune response. Histology, cytokine profiling, and flow cytometry indicates a  
80 massive influx of neutrophils in the mice inoculated with *chs3Δ*. Mice depleted of  
81 neutrophils all survived inoculation of the *chs3Δ* strain, indicating that the observed  
82 mortality is neutrophil mediated. Together, these results suggest that chitin synthase 3 is  
83 important in modulating the immune response to *Cryptococcus*.

#### 84 **Results:**

#### 85 **Complete deletion and complementation of *C. neoformans* chitin synthase 3** 86 **(Chs3).**

87 With better annotation of the cryptococcal genome, we found that our previously  
88 reported *chs3Δ* strain (8) was not a complete deletion. While the protein is not functional  
89 as the catalytic domain was deleted, the original strain still harbored 689 bp of gene  
90 sequence potentially sufficient to encode a ~25 kDa protein. As this gene is highly  
91 expressed under vegetative growth, the truncated protein might influence either the  
92 virulence or the nature of the host immune response to the mutant. Due to this, we  
93 generated a complete deletion of the *chs3* gene, including the 5' UTR to delete the

94 promoter as well, in KN99 by biolistic transformation. All the isolates were characterized  
95 by diagnostic PCR screening and southern blot hybridization.

96 The original *chs3Δ* strain exhibited a large number of phenotypes including  
97 changes in morphology including 2-3 fold enlarged cells and a budding defect,  
98 temperature sensitivity, leaky melanin, and chitosan deficiency, among others (8). Cells  
99 of the new *chs3Δ* strain exhibited the same morphologic changes observed in the original  
100 strain (Fig. 1A). Additionally, the new *chs3Δ* strain is also temperature sensitive (Fig. 1B)  
101 and deficient in chitosan (Fig. 1C).

102 Previously we attempted to complement the original *chs3Δ* strain a multitude of  
103 ways and all attempts failed, leading us to conclude that the cell wall of the *chs3Δ* strain  
104 was compromised to a point that they could not survive any of the transformation  
105 procedures. (9). With this in mind, we attempted to complement the new *chs3Δ* strain  
106 using electroporation into the endogenous locus, replacing the NAT resistance marker  
107 and were successful. The complemented strain (*chs3Δ::CHS3*) reversed all the observed  
108 phenotypes including the changes in morphology, temperature sensitivity and chitosan  
109 deficiency (Fig. 1A-C).

#### 110 **Inoculation with the *chs3Δ* strain induces rapid mouse mortality.**

111 We have previously shown that chitosan is essential for growth in the mammalian  
112 host. Strains with three different chitosan deficiency genotypes (*chs3Δ*, *csr2Δ*, and  
113 *cda1Δ2Δ3Δ*) all show rapid pulmonary clearance in a mouse model of cryptococcosis and  
114 complete loss of virulence (9). Mice that received a high inoculation ( $10^7$  CFU) of the  
115 chitosan deficient strain *cda1Δcda2Δcda3Δ* were able to clear the infection and were

116 found to be protected against a subsequent challenge with wild-type KN99 (WT) *C.*  
117 *neoformans* (10). Notably, this chitosan deficient strain is protective even when heat-killed  
118 (10). Protective immunization is dependent on the inoculum size, as only mice that  
119 received  $10^7$  CFU of *cda1Δcda2Δcda3Δ* were protectively immunized, mice that received  
120 a lower inoculation were not protected (10).

121         Based on these data, we set out to test whether inoculation with other chitosan  
122 deficient strains would also confer protection. We started this process using the new  
123 *chs3Δ* strain which is chitosan deficient (Fig. 1C). We inoculated C57BL/6 mice  
124 intranasally with  $10^7$  CFU of live *cda1Δ2Δ3Δ* (a concentration that is shown to be  
125 protective for *cda1Δ2Δ3Δ*), *chs3Δ*, *chs3Δ::CHS3*, or WT *C. neoformans* KN99 and were  
126 monitored for survival. As expected, mice that received *cda1Δ2Δ3Δ* all survived the  
127 infection and mice that received the WT KN99 or *chs3Δ::CHS3* all died or were euthanized  
128 due to morbidity around day 6 (KN99) or day 8 (*chs3Δ::CHS3*) post inoculation with this  
129 high inoculum (Fig. 2). What was surprising, however, was that the mice inoculated with  
130 *chs3Δ* all died within 36 hours after instillation of the organism (Fig. 2).

131         The rapid rate of mortality suggested death was not due to fungal proliferation or  
132 burden. Furthermore, we previously showed that the original *chs3Δ* strain is rapidly  
133 cleared from the host at a lower inoculum (9). Based on these finding, we tested if  
134 mortality was dependent on viable fungi. We heat-killed (HK) WT KN99, *chs3Δ*, and  
135 *chs3Δ::CHS3* strains at 70°C for 15 minutes. Complete killing was confirmed by plating  
136 for CFUs. C57BL/6 mice then received an intranasal inoculation with  $10^7$  CFU of HK WT  
137 KN99, HK *chs3Δ* or HK *chs3Δ::CHS3* and were monitored for survival. Mice that received  
138 HK WT KN99 or HK *chs3Δ::CHS3* all survived the inoculation of heat killed cells (Fig. 3A).

139 Conversely, mice that received HK *chs3Δ* all died at the same rate as observed above  
140 with live *chs3Δ* (Figs. 2 and 3A) indicating that mortality was not dependent on the viability  
141 of the fungi. In addition, to confirm that the observed phenotype was due to loss of Chs3  
142 and not some secondary mutation in the strain used, we assayed the original *chs3Δ*  
143 mutant strain (Supplemental figure 1) and saw the same rapid mortality observed in  
144 Figure 3A.

145 Different mouse backgrounds have various susceptibilities to *C. neoformans*  
146 depending on the strain used (11). Due to the strong phenotype observed with *chs3Δ* in  
147 the C57BL/6 mice, we wanted to verify that rapid rate of mortality was not due to the  
148 mouse background. To assess susceptibility in different mouse backgrounds, BALB/c or  
149 CBA/J mice received an intranasal inoculation with  $10^7$  CFU of HK WT KN99, HK *chs3Δ*  
150 or HK *chs3Δ::CHS3* and were monitored for survival. Regardless of the mouse  
151 background, mice that received HK WT KN99 or HK *chs3Δ::CHS3* all survived the  
152 challenge, whereas mice that received HK *chs3Δ* all died at the same rate as observed  
153 in the C57BL/6 mice (Figs. 3A-C) indicating that rapid rate of mortality was not a mouse  
154 background phenomenon.

### 155 **A massive inflammatory response is triggered to *chs3Δ* inoculation.**

156 The above data indicates that mice are not dying due to the fungal burden, as  
157 death was not dependent on viable fungi in multiple mouse backgrounds (Figure 3).  
158 These data suggest that the mortality associated with *chs3Δ* maybe host mediated (12).  
159 To test this, C57BL/6 mice received an intranasal inoculation with  $10^7$  CFU HK WT KN99,  
160 HK *chs3Δ* or HK *chs3Δ::CHS3* and the lungs were processed for histology. For all immune  
161 studies, we chose to use heat-killed fungi to control for fungal burden as the WT KN99



162 and *chs3Δ::CHS3* would rapidly outgrow the *chs3Δ* strain and potentially skew our results.  
163 Lungs were processed at 8 hours post inoculation as we could not constantly keep the  
164 *chs3Δ* inoculated mice alive for the full 24h. The 8-hour time point was chosen as this  
165 was the time the animal started to show signs of morbidity. The paraffin embedded lungs  
166 were sectioned and processed for hematoxylin-eosin (H&E) staining. Histological  
167 analysis of the infected lung show little pathology in the lung of the mice inoculated with  
168 either HK KN99 or HK *chs3Δ::CHS3* compared to the strong inflammatory response in  
169 the lungs of the *chs3Δ* inoculated mice at 8h (Figure 4). The lungs from mice inoculated  
170 with *chs3Δ* exhibit abundant foci of inflammation spread across the whole lung section  
171 (Fig 4C) consisting of a profound amount of mixed inflammatory infiltrates with enhanced  
172 presences of granulocytes (Figs 4D-E). Such severe pneumonia and lung damage could  
173 explain the mortality observed in *chs3Δ* inoculated mice and indicates that the immune  
174 response in the lungs, albeit robust, is nonprotective and detrimental.

175 ***chs3Δ* induces a strong proinflammatory cytokine response.**

176 Because we observed massive infiltration of immune cells in the lungs of *chs3Δ*  
177 inoculated mice (Figs 4D-E), we next assessed the cytokine/chemokine produced. To do  
178 this, C57BL/6 mice received an intranasal inoculation with  $10^7$  CFU HK WT KN99, HK  
179 *chs3Δ* or HK *chs3Δ::CHS3* and at 8hr post inoculation homogenates were prepared from  
180 the lungs of each group as well as a PBS control group. Cytokine/chemokine responses  
181 were determined from the lung homogenates using the Bio-Plex Protein Array System.  
182 We observed an increase in multiple cytokines (Supplementary Figure 2), however there  
183 was a significant increase in the chemokines KC (Fig. 5A) and G-CSF (Fig. 5B), as well  
184 as extremally high levels of IL-6 (Fig. 5C) in *chs3Δ* inoculated mice compared to PBS,

185 HK WT KN99 or HK *chs3Δ::CHS3* inoculated mice. This cytokine profile is indicative of a  
186 strong neutrophilic response in the lungs which correlates with the histology data above  
187 indicating an enhanced presence of granulocytes (Figure 4).

188 **A significant increase in neutrophil recruitment in the lungs of *chs3Δ* inoculated**  
189 **mice.**

190 Since both the histology and cytokine analysis indicates a strong inflammatory  
191 response, we wanted to identify the responding cells. For this, C57BL/6 mice received an  
192 intranasal inoculation with  $10^7$  CFU of HK WT KN99, HK *chs3Δ* or HK *chs3Δ::CHS3* and  
193 at 8hr post inoculation pulmonary leukocytes were isolated from the lungs of each group  
194 by enzymatic digestion and subjected to flow cytometry analysis for leukocyte identity  
195 (Supplementary Figure 3). Consistent with the above histology data, there was a  
196 significant increase in the total number of immune cells in the lungs of *chs3Δ* inoculated  
197 mice (Fig. 6A). In addition, there was a significant increase in both the total number and  
198 percent neutrophils in the lungs *chs3Δ* inoculated mice compared to the WT KN99 or HK  
199 *chs3Δ::CHS3* inoculated mice (Figs 6B-C). We did not observe a significant change in  
200 any of the other cell types assayed (Supplementary Figure 4).

201 **Depletion of neutrophils protects *chs3Δ* inoculated mice.**

202 Due to the significant increase in neutrophil recruitment to the lungs of mice  
203 inoculated with the *chs3Δ* strain, we sought to determine the role of neutrophils in the  
204 rapid mortality observed in these animals. To test this, C57BL/6 mice were injected with  
205 200ug of anti-Ly6G (1A8), an antibody that specifically depletes neutrophils (13, 14)) or  
206 an isotype antibody 24 hours before intranasal inoculation with  $10^7$  CFU of HK *chs3Δ* and

207 monitored for survival. Mice were injected with antibody every 24 hours for the first 5 days  
208 post challenge. After day 5, the mice were injected every 48 hours. This antibody is  
209 usually injected every 48 hours, however, with the high number of neutrophils recruited  
210 (Fig. 6) and the elevated levels of neutrophil growth factors (Fig. 5) we elected to increase  
211 the number of the initial injections to ensure neutrophil depletion. Mice treated with the  
212 isotype antibody all died at the same rate as observed above with HK *chs3Δ* (Figs. 3A  
213 and 7A), whereas mice that were treated with anti-Ly6G all survived (Fig. 7A) indicating  
214 that death was neutrophil mediated. To confirm this finding, we repeated the experiment  
215 in BALB/c and CBA/J mice. Consistent with our findings in C57BL/6, mice that were  
216 depleted of neutrophils all survived inoculation with HK *chs3Δ* whereas mice treated with  
217 the isotype antibody all died regardless of mouse background (Figs 7B-C). These data  
218 demonstrate that the rapid rate of mortality observed in mice inoculated *chs3Δ* is  
219 neutrophil dependent.

## 220 **Discussion:**

221 We have previously shown that deletion of a specific chitin synthase (CHS3), or  
222 deletion of all three chitin deacetylases causes a significant reduction in chitosan in the  
223 vegetative cell wall (9). These chitosan deficient strains of *C. neoformans* were found to  
224 be avirulent and rapidly cleared from the murine lung (9). Moreover, infection with a  
225 chitosan deficient *C. neoformans* strain lacking three chitin deacetylases (*cda1Δ2Δ3Δ*)  
226 was found to confer protective immunity to a subsequent challenge with a virulent wild  
227 type counterpart (10). These findings suggest that there is an altered host response to  
228 chitosan-deficient strains. Surprisingly, we observed that mice inoculated with chitosan-  
229 deficient *chs3Δ* all died within 36 hours (Figs. 2 and 3) and death was associated with an

230 aberrant hyperinflammatory immune response indicating that chitosan is critical in  
231 modulating the immune response to *Cryptococcus*.

232         The immune response to *Cryptococcus*, as well as the magnitude of the response,  
233 can play a protective or detrimental role. Our data fits well within the damage-response  
234 framework proposed by Casadevall and Pirofski (12) where host damage or benefit is  
235 dependent on the host response. This is represented as a parabolic curve, where too little  
236 of a response to a microorganism can lead to damage caused by the microorganism and  
237 too strong of a host response can lead to damage caused by the host response. This  
238 framework is observed in cryptococcal infected AIDS patients. Too little of a response  
239 can lead to patient death due to the fungus, whereas a hyperactive response can lead to  
240 death caused by immunopathology. AIDS patients treated with antiretroviral therapy often  
241 develop cryptococcal immune reconstitution inflammatory syndrome (IRIS) which is an  
242 exaggerated and frequently deadly inflammatory reaction that complicates recovery from  
243 immunodeficiency (15). Cryptococcal IRIS emphasizes the potential role of the host  
244 immune system in mediating host damage and disease symptoms.

245         There is precedent to study mutants that induce an aberrant hyperinflammatory  
246 immune response, as similar responses have been observed with cryptococcal IRIS.  
247 Cryptococcal IRIS develops in 8-49% of patients with known cryptococcal disease before  
248 antiretroviral therapy (16). The pathogenesis of IRIS is poorly understood, and prediction  
249 of IRIS is not currently possible. Innate immune cells, such as monocytes and neutrophils,  
250 are of increasing interest in IRIS pathophysiology, since granuloma appears to be  
251 frequently found in IRIS lesions (15). Additionally, at the time of IRIS onset multiple  
252 proinflammatory cytokine are detected, including IL-6 (17). Further study of the *chs3Δ*

253 immune response could advance our understanding of host immune mechanisms  
254 involved in an inappropriately strong immune response to *Cryptococcus*, like those seen  
255 in immune reconstitution inflammatory syndrome. These studies have the potential to  
256 advance our understanding of a significant problem in the management of cryptococcal  
257 patients.

258 Other cryptococcal mutants that have defects in the cell wall, like *rim101Δ*, have  
259 been found to induce a strong proinflammatory response and lead to neutrophil  
260 recruitment (18), however, not to the order of magnitude observed with *chs3Δ*.  
261 Neutrophils have a complicated role in the cryptococcal immune response. While  
262 neutrophils can kill *C. neoformans*, the fungus can modulate the neutrophil response.  
263 Cryptococcal capsular and cell wall components can inhibit neutrophil migration (19, 20),  
264 and can inhibit the production of neutrophil extracellular traps (21). In the brain,  
265 neutrophils have been shown to be important in clearance of the fungus from  
266 the microvasculature (22, 23). Neutrophil depletion in a protective immunization model  
267 did not affect pulmonary fungal burden, indicating that neutrophils are not required for  
268 clearance (13) or for the secondary response (14). These data further support the  
269 observation by Mednick et al. that neutropenic mice given a pulmonary *C. neoformans*  
270 infection survived significantly longer than control mice that had an intact neutrophil  
271 compartment (24), therefore indicating that neutrophils are not necessary for protective  
272 responses against cryptococcal infection. We observed a significant increase in  
273 neutrophil recruitment to the lungs of mice inoculated with the *chs3Δ* strain (Figs 6B-C).  
274 Mice inoculated with HK *chs3Δ* and depletion of neutrophils all survived whereas the  
275 isotype treated mice all died (Fig. 7), indicating a detrimental role of neutrophils. Further

276 supporting a harmful role for neutrophils, mice with genetically-induced neutrophilia  
277 appear to have increased susceptibility to cryptococcal disease (25). More work is needed  
278 to elucidate our understanding the cryptococcus:neutrophil interactions.

279 In summary, we have shown that inoculation with either live or dead cells from  
280 the chitosan deficient strain, *chs3Δ*, leads to death of the mice within 36 hours. The  
281 rapid onset of death is likely due to an aberrant hyperinflammatory immune response  
282 as mortality was not dependent on viable fungi. Histology, cytokine profiling, and flow  
283 cytometry indicates a massive influx of neutrophils in the mice inoculated with *chs3Δ*.  
284 Depletion studies show a damaging role for neutrophils in the response to *chs3Δ*.  
285 Altogether, chitosan plays a major role in the immune response to *C. neoformans*. In  
286 addition, the response to chitosan deficient *C. neoformans* seems to depend on the type  
287 of genes deleted, as not all chitosan deficient strains induce the same immune  
288 response.

289

## 290 **Materials and Methods:**

### 291 **Fungal strains and media:**

292 *C. neoformans* strain KN99 $\alpha$  was used as the wild-type strain and as progenitor of mutant  
293 strains. Strains were grown in YPD broth (1% yeast extract, 2% bacto-peptone, and 2%  
294 dextrose) or on YPD solid media containing 2% bacto-agar. Selective YPD media was  
295 supplemented with 100  $\mu$ g/mL nourseothricin (NAT) (Werner BioAgents, Germany).

### 296 **Strain construction:**

297 Gene-specific deletion construct of the chitin synthase 3 gene (CNAG\_05581) was  
298 generated using overlap PCR gene technology described previously (26, 27) and  
299 included the nourseothricin resistance cassette. The primers used to disrupt the genes  
300 are shown in Table S1. The Chs3 deletion cassette contained the nourseothricin  
301 resistance cassette resulting in a 1,539 bp replacement of the genomic sequence  
302 between regions of primers 3-Chs3 and 6-Chs3 shown in upper case in Table S1. The  
303 construct was introduced into the KN99 $\alpha$  strain using biolistic techniques (28). To  
304 generate a *CHS3* complement strain, we replaced the NAT resistance cassette in  
305 the *chs3* deletion strain with the native *CHS3* gene sequence by electroporation (29) and  
306 screened for NAT sensitivity.

#### 307 **Morphological analysis:**

308 Cells were incubated for 2 days in YPD medium at 30°C with shaking and diluted to an  
309 OD<sub>650</sub> of 0.2 with PBS. Five microliters each cell solution was spotted on to a clean glass  
310 slide and photographed on an Olympus BX61 microscope.

#### 311 **Evaluation of temperature sensitivity:**

312 Wild-type, *chs3* deletion and *chs3* $\Delta$ ::*CHS3* complement strains were grown in liquid YPD  
313 for 2 days at 30°C with shaking. Cells were diluted to OD<sub>650</sub>=1.0 and 10-fold serial  
314 dilutions were made. Five microliters of each dilution were spotted on YPD plates and the  
315 plates were incubated for 2-3 days at 30°C and 39°C and photographed.

#### 316 **Cellular chitosan measurement:**

317 As previously described, MBTH (3-methyl -2-benzothiazolinone hydrazone) based  
318 chemical method was used to determine the chitin and chitosan content (30). In brief,

319 cells were grown in liquid YPD for 2 days at 30°C with shaking collected by centrifugation.  
320 Cell pellets were washed two times with PBS, pH 7.4 and lyophilized. The dried samples  
321 were resuspended in water first before adding KOH to a final concentration of 6% KOH  
322 (w/v). The alkali suspended material was incubated at 80°C for 30 min with vortexing in  
323 between to eliminate non-specific MBTH reactive molecules from the cells. Alkali treated  
324 material was then washed several times with PBS, pH 7.4 to make sure that the pH of the  
325 cell suspension was brought back to neutral pH. Finally, the cell material was  
326 resuspended in PBS, pH 7.4 to a concentration of 10mg/mL in PBS (by dry weight) and  
327 a 0.1 mL of each samples was used in the MBTH assay (31).

#### 328 **Mice:**

329 BALB/c (000651), CBA/J (000656), and C57BL/6 (000664) mice were obtained from  
330 Jackson Laboratory (Bar Harbor, ME). BALB/c and C57BL/6 obtained from Jackson Labs  
331 are also known as BALB/cJ and C57BL/6 respectively. All mice were 6 to 8 weeks old at  
332 the time of inoculation. All animal protocols were reviewed and approved by the Animal  
333 Studies Committee of the Washington University School of Medicine and conducted  
334 according to National Institutes of Health guidelines for housing and care of laboratory  
335 animals.

#### 336 **Pulmonary inoculations:**

337 Strains were grown at 30°C, 300 rpm for 48 hours in 50 mL YPD. The cells were  
338 centrifuged, washed in endotoxin-free 1x PBS and counted with a haemocytometer. For  
339 studies utilizing heat-killed organism, after being diluted to the desired cell number in  
340 PBS, the inoculum was heated at 70°C for 15 minutes. Complete killing was assayed by  
341 plating for CFUs. Mice were anaesthetized with an intraperitoneal injection (200 µL) of



342 ketamine (8 mg/mL)/dexmedetomidine (0.05 mg/mL) mixture and then given an intranasal  
343 inoculation with  $1 \times 10^7$  CFU of live or heat-killed organism in 50  $\mu$ L of sterile PBS.  
344 Anesthesia was reversed by an intraperitoneal injection of (200  $\mu$ L) of antipamezole  
345 (0.25mg/mL). The mice were fed *ad libitum* and monitored daily for symptoms. For  
346 survival studies mice were sacrificed when body weight fell below 80% of weight at the  
347 time of inoculation. For cytokine analysis, flow cytometry studies, and histology, mice  
348 were euthanized at 8-hours post-inoculation by CO<sub>2</sub> inhalation and the lungs were  
349 harvested.

#### 350 **Histology:**

351 Mice were sacrificed according to approved protocols, perfused intracardially with sterile  
352 PBS, and the lungs inflated with 10% formalin. Lung tissue was then fixed for 48 hours in  
353 10% formalin and submitted to HistoWiz Inc. ([histowiz.com](http://histowiz.com)) for histology using a Standard  
354 Operating Procedure and fully automated workflow. Samples were processed, embedded  
355 in paraffin, sectioned at 4 $\mu$ m and stained using hematoxylin-eosin (H&E). After staining,  
356 sections were dehydrated and film coverslipped using a TissueTek-Prisma and  
357 Coverslipper (SakuraUSA, Torrance, CA). Whole slide scanning (40x) was performed on  
358 an Aperio AT2 (Leica Biosystems, Wetzlar, Germany).

#### 359 **Cytokine Analysis:**

360 Cytokine levels in lung tissues were analyzed using the Bio-Plex Protein Array System  
361 (Bio-Rad Laboratories, Hercules, CA). Briefly, lung tissue was excised and homogenized  
362 in 2 ml of ice-cold PBS containing 1X Pierce Protease Inhibitor cocktail (Thermo Scientific,  
363 Rockford, IL). After a homogenization, Triton X-100 was added to a final concentration of  
364 0.05% and the samples were clarified by centrifugation. Supernatant fractions from the

365 pulmonary homogenates were then assayed using the Bio-Plex Pro Mouse Cytokine 23-  
366 Plex (Bio-Rad Laboratories) for the presence of IL-1 $\alpha$ , IL-1 $\beta$ , IL-2, IL-3, IL-4, IL-5, IL-6, IL-  
367 9, IL-10, IL-12 (p40), IL-12 (p70), IL-13, IL-17A, granulocyte colony stimulating factor (G-  
368 CSF), granulocyte monocyte colony stimulating factor (GM-CSF), interferon- $\gamma$  (IFN- $\gamma$ ),  
369 CXCL1/keratinocyte-derived chemokine (KC), CCL2/monocyte chemotactic protein-1  
370 (MCP-1), CCL3/macrophage inflammatory protein-1 $\alpha$  (MIP-1 $\alpha$ ), CCL4/MIP-1 $\beta$ ,  
371 CCL5/regulated upon activation, normal T cell expressed and secreted (RANTES) and  
372 tumor necrosis factor- $\alpha$  (TNF- $\alpha$ ).

### 373 **Flow Cytometry:**

374 Cell populations in the lungs were identified by flow cytometry. Briefly, lungs from  
375 individual mice were enzymatically digested at 37°C for 30 min in digestion buffer (RPMI  
376 1640 containing 1 mg/ml of collagenase type IV). The digested tissues were then  
377 successively passed through sterile 70 and 40  $\mu$ m pore nylon strainers (BD Biosciences,  
378 San Jose, CA). Erythrocytes in the strained suspension were lysed by incubation in NH<sub>4</sub>Cl  
379 buffer (0.859% NH<sub>4</sub>Cl, 0.1% KHCO<sub>3</sub>, 0.0372% Na<sub>2</sub>EDTA; pH 7.4; Sigma-Aldrich) for 3  
380 min on ice, followed by the addition of a 2-fold excess of PBS. The leukocytes were then  
381 collected by centrifugation, resuspended in sterile PBS, and were stained using the  
382 LIVE/DEAD™ Fixable Blue Dead Cell Stain Kit (1:1000; Invitrogen, Carlsbad, CA) for 30  
383 min at 4° C in the dark. Following incubation, samples were washed and resuspended  
384 FACS buffer (PBS, 0.1% BSA, 0.02%NaN<sub>3</sub>, 2mM EDTA) and incubated with CD16/CD32  
385 (Fc Block™; BD Biosciences, San Jose, CA) for 5 min. For flow cytometry, 1x10<sup>6</sup> cells  
386 were incubated for 30 min at 4° C in the dark with optimal concentrations of fluorochrome-  
387 conjugated antibodies (Table S2 for antigen, clone and source) diluted in Brilliant Stain

388 Buffer (BD Biosciences). After three washes with FACS buffer, the cells were fixed in 2%  
389 ultrapure paraformaldehyde. For data acquisition, >200,000 events were collected on a  
390 BD LSRFortessa X-20 flow cytometer (BD Biosciences, San Jose, CA), and the data were  
391 analyzed with FlowJo V10 (TreeStar, Ashland, OR). The absolute number of cells in each  
392 leukocyte subset was determined by multiplying the absolute number of CD45<sup>+</sup> cells by  
393 the percentage of cells stained by fluorochrome-labeled antibodies for each cell  
394 population analyzed.

#### 395 **Neutrophil depletion:**

396 Mice were depleted of neutrophils via intraperitoneal (ip) administration of 200 µg anti-  
397 Ly6G (clone 1A8; BioXcell) in 100 µl. Control mice received 200 µg IgG2a isotype control  
398 antibody (clone 2A3; BioXcell) in 100 µl. Depletions were started 24 hours prior to  
399 challenge and the mice were injected every 24 hours for the first 5 days post challenge.  
400 After day 5, the mice were injected every 48 hours.

#### 401 **Statistics:**

402 Data were analyzed using GraphPad Prism, version 8.0 (GraphPad Software, Inc., La  
403 Jolla, CA). The one-way analysis of variance (ANOVA) with the Tukey's multiple-  
404 correction test was used to compare more than two groups. Kaplan-Meier survival curves  
405 were compared using the Mantel-Cox log rank test. p values <0.05 were considered  
406 significant.

#### 407 **Acknowledgments:**

408 This work was funded by National Institutes of Health grants AI072195 and AI125045 to  
409 JKL. CRH was partly funded by a National Institute of Allergy and Infectious Diseases  
410 training grant (T32 AI007172). The funders had no role in study design, data collection  
411 and interpretation, or the decision to submit the work for publication.

412

413 **References:**

- 414 1. **Andama AO, den Boon S, Meya D, Cattamanchi A, Worodria W, Davis JL,**  
415 **Walter ND, Yoo SD, Kalema N, Haller B, Huang L, International HIVAOPS.**  
416 2013. Prevalence and outcomes of cryptococcal antigenemia in HIV-seropositive  
417 patients hospitalized for suspected tuberculosis in Uganda. *J Acquir Immune*  
418 *Defic Syndr* **63**:189-194.
- 419 2. **Denning DW.** 2016. Minimizing fungal disease deaths will allow the UNAIDS  
420 target of reducing annual AIDS deaths below 500 000 by 2020 to be realized.  
421 *Philos Trans R Soc Lond B Biol Sci* **371**.
- 422 3. **Heitman J, Kozel TR, Kwon-Chung KJ, Perfect JR, Casadevall A.** 2010.  
423 *Cryptococcus*: from human pathogen to model yeast. ASM press.
- 424 4. **Jarvis JN, Bicanic T, Loyse A, Namarika D, Jackson A, Nussbaum JC,**  
425 **Longley N, Muzoora C, Phulusa J, Taseera K, Kanyembe C, Wilson D,**  
426 **Hosseinipour MC, Brouwer AE, Limmathurotsakul D, White N, van der**  
427 **Horst C, Wood R, Meintjes G, Bradley J, Jaffar S, Harrison T.** 2014.  
428 Determinants of mortality in a combined cohort of 501 patients with HIV-  
429 associated Cryptococcal meningitis: implications for improving outcomes. *Clinical*

- 430 Infectious Diseases : an official publication of the Infectious Diseases Society of  
431 America **58**:736-745.
- 432 5. **Rajasingham R, Smith RM, Park BJ, Jarvis JN, Govender NP, Chiller TM,**  
433 **Denning DW, Loyse A, Boulware DR.** 2017. Global burden of disease of HIV-  
434 associated cryptococcal meningitis: an updated analysis. *Lancet Infect Dis*  
435 **17**:873-881.
- 436 6. **Pyrgos V, Seitz AE, Steiner CA, Prevots DR, Williamson PR.** 2013.  
437 Epidemiology of cryptococcal meningitis in the US: 1997-2009. *PLoS One*  
438 **8**:e56269.
- 439 7. **Elieh Ali Komi D, Sharma L, Dela Cruz CS.** 2018. Chitin and Its Effects on  
440 Inflammatory and Immune Responses. *Clin Rev Allergy Immunol* **54**:213-223.
- 441 8. **Banks IR, Specht CA, Donlin MJ, Gerik KJ, Levitz SM, Lodge JK.** 2005. A  
442 chitin synthase and its regulator protein are critical for chitosan production and  
443 growth of the fungal pathogen *Cryptococcus neoformans*. *Eukaryot Cell* **4**:1902-  
444 1912.
- 445 9. **Baker LG, Specht CA, Lodge JK.** 2011. Cell wall chitosan is necessary for  
446 virulence in the opportunistic pathogen *Cryptococcus neoformans*. *Eukaryot Cell*  
447 **10**:1264-1268.
- 448 10. **Upadhy R, Lam WC, Maybruck B, Specht CA, Levitz SM, Lodge JK.** 2016.  
449 Induction of Protective Immunity to Cryptococcal Infection in Mice by a Heat-  
450 Killed, Chitosan-Deficient Strain of *Cryptococcus neoformans*. *MBio* **7**.
- 451 11. **Huffnagle GB, Boyd MB, Street NE, Lipscomb MF.** 1998. IL-5 is required for  
452 eosinophil recruitment, crystal deposition, and mononuclear cell recruitment

- 453 during a pulmonary *Cryptococcus neoformans* infection in genetically susceptible  
454 mice (C57BL/6). J Immunol **160**:2393-2400.
- 455 12. **Casadevall A, Pirofski LA.** 2003. The damage-response framework of microbial  
456 pathogenesis. Nat Rev Microbiol **1**:17-24.
- 457 13. **Wozniak KL, Kolls JK, Wormley FL, Jr.** 2012. Depletion of neutrophils in a  
458 protective model of pulmonary cryptococcosis results in increased IL-17A  
459 production by gammadelta T cells. BMC Immunol **13**:65.
- 460 14. **Leopold Wager CM, Hole CR, Campuzano A, Castro-Lopez N, Cai H,**  
461 **Caballero Van Dyke MC, Wozniak KL, Wang Y, Wormley FL, Jr.** 2018. IFN-  
462 gamma immune priming of macrophages in vivo induces prolonged STAT1  
463 binding and protection against *Cryptococcus neoformans*. PLoS Pathog  
464 **14**:e1007358.
- 465 15. **Delliere S, Guery R, Candon S, Rammaert B, Aguilar C, Lanternier F,**  
466 **Chatenoud L, Lortholary O.** 2018. Understanding Pathogenesis and Care  
467 Challenges of Immune Reconstitution Inflammatory Syndrome in Fungal  
468 Infections. J Fungi (Basel) **4**.
- 469 16. **Haddow LJ, Colebunders R, Meintjes G, Lawn SD, Elliott JH, Manabe YC,**  
470 **Bohjanen PR, Sungkanuparph S, Easterbrook PJ, French MA, Boulware**  
471 **DR, International Network for the Study of HIVaI.** 2010. Cryptococcal immune  
472 reconstitution inflammatory syndrome in HIV-1-infected individuals: proposed  
473 clinical case definitions. Lancet Infect Dis **10**:791-802.
- 474 17. **Boulware DR, Meya DB, Bergemann TL, Wiesner DL, Rhein J, Musubire A,**  
475 **Lee SJ, Kambugu A, Janoff EN, Bohjanen PR.** 2010. Clinical features and

- 476 serum biomarkers in HIV immune reconstitution inflammatory syndrome after  
477 cryptococcal meningitis: a prospective cohort study. *PLoS Med* **7**:e1000384.
- 478 18. **O'Meara TR, Holmer SM, Selvig K, Dietrich F, Alspaugh JA.** 2013.  
479 *Cryptococcus neoformans* Rim101 is associated with cell wall remodeling and  
480 evasion of the host immune responses. *MBio* **4**.
- 481 19. **Ellerbroek PM, Lefeber DJ, van Veghel R, Scharringa J, Brouwer E, Gerwig**  
482 **GJ, Janbon G, Hoepelman AI, Coenjaerts FE.** 2004. O-acetylation of  
483 cryptococcal capsular glucuronoxylomannan is essential for interference with  
484 neutrophil migration. *J Immunol* **173**:7513-7520.
- 485 20. **Coenjaerts FE, Walenkamp AM, Mwinzi PN, Scharringa J, Dekker HA, van**  
486 **Strijp JA, Cherniak R, Hoepelman AI.** 2001. Potent inhibition of neutrophil  
487 migration by cryptococcal mannoprotein-4-induced desensitization. *J Immunol*  
488 **167**:3988-3995.
- 489 21. **Rocha JD, Nascimento MT, Decote-Ricardo D, Corte-Real S, Morrot A,**  
490 **Heise N, Nunes MP, Previato JO, Mendonca-Previato L, DosReis GA,**  
491 **Saraiva EM, Freire-de-Lima CG.** 2015. Capsular polysaccharides from  
492 *Cryptococcus neoformans* modulate production of neutrophil extracellular traps  
493 (NETs) by human neutrophils. *Sci Rep* **5**:8008.
- 494 22. **Zhang M, Sun D, Liu G, Wu H, Zhou H, Shi M.** 2016. Real-time in vivo imaging  
495 reveals the ability of neutrophils to remove *Cryptococcus neoformans* directly  
496 from the brain vasculature. *J Leukoc Biol* **99**:467-473.
- 497 23. **Sun D, Zhang M, Liu G, Wu H, Li C, Zhou H, Zhang X, Shi M.** 2016.  
498 Intravascular clearance of disseminating *Cryptococcus neoformans* in the brain

- 499 can be improved by enhancing neutrophil recruitment in mice. *Eur J Immunol*  
500 **46**:1704-1714.
- 501 24. **Mednick AJ, Feldmesser M, Rivera J, Casadevall A.** 2003. Neutropenia alters  
502 lung cytokine production in mice and reduces their susceptibility to pulmonary  
503 cryptococcosis. *Eur J Immunol* **33**:1744-1753.
- 504 25. **Wiesner DL, Smith KD, Kashem SW, Bohjanen PR, Nielsen K.** 2017. Different  
505 Lymphocyte Populations Direct Dichotomous Eosinophil or Neutrophil  
506 Responses to Pulmonary *Cryptococcus* Infection. *J Immunol* **198**:1627-1637.
- 507 26. **Davidson RC, Blankenship JR, Kraus PR, de Jesus Berrios M, Hull CM,**  
508 **D'Souza C, Wang P, Heitman J.** 2002. A PCR-based strategy to generate  
509 integrative targeting alleles with large regions of homology. *Microbiology*  
510 **148**:2607-2615.
- 511 27. **Gerik KJ, Donlin MJ, Soto CE, Banks AM, Banks IR, Maligie MA,**  
512 **Selitrennikoff CP, Lodge JK.** 2005. Cell wall integrity is dependent on the PKC1  
513 signal transduction pathway in *Cryptococcus neoformans*. *Mol Microbiol* **58**:393-  
514 408.
- 515 28. **Toffaletti DL, Rude TH, Johnston SA, Durack DT, Perfect JR.** 1993. Gene  
516 transfer in *Cryptococcus neoformans* by use of biolistic delivery of DNA. *J*  
517 *Bacteriol* **175**:1405-1411.
- 518 29. **Gerik KJ, Bhimireddy SR, Ryerse JS, Specht CA, Lodge JK.** 2008. PKC1 is  
519 essential for protection against both oxidative and nitrosative stresses, cell  
520 integrity, and normal manifestation of virulence factors in the pathogenic fungus  
521 *Cryptococcus neoformans*. *Eukaryot Cell* **7**:1685-1698.



- 522 30. **Upadhy R, Baker LG, Lam WC, Specht CA, Donlin MJ, Lodge JK.** 2018.  
523 *Cryptococcus neoformans* Cda1 and Its Chitin Deacetylase Activity Are Required  
524 for Fungal Pathogenesis. MBio **9**.
- 525 31. **Smith RL, Gilkerson E.** 1979. Quantitation of glycosaminoglycan hexosamine  
526 using 3-methyl-2-benzothiazolone hydrazone hydrochloride. Anal Biochem  
527 **98**:478-480.

528

529

530 **Figure legends:**

531 **Figure 1. Deletion and complementation of *C. neoformans* chitin synthase 3 (Chs3):**

532 (A) For morphological analysis, cells were incubated for 2 days in YPD and diluted to an  
533 OD<sub>650</sub> of 0.2 with PBS. Five microliters each cell solution was spotted on to a clean glass  
534 slide and photographed at 40X. (B) Temperature sensitivity. Cultures were grown  
535 overnight in YPD then diluted to an OD<sub>650</sub> of 1.0. Tenfold serial dilutions were made in  
536 PBS and 3µl of each was plated. The plates were grown for 4 days at 30°C or 39°C. (C)  
537 Quantitative determination of cell wall chitosan by the MBTH assay. Cells were grown in  
538 YPD for two days, collected, washed and used for the assay. Data represents the average  
539 of three biological experiments ± standard deviation (SD) and are expressed as nMoles  
540 of glucosamine per mg dry weight of yeast cells (\*\*\*,  $P < 0.001$ ).

541 **Figure 2. Inoculation with the *chs3*Δ strain induces rapid mouse mortality: C57BL/6**

542 mice were infected with 10<sup>7</sup> live CFUs of each strain by intranasal inoculation. Survival of  
543 the animals was recorded as mortality of mice for 40 days post inoculation. Mice that lost

544 20% of the body weight at the time of inoculation or displayed signs of morbidity were  
545 considered ill and sacrificed. Data is representative of one experiment with 5 mice for  
546 KN99, 5 mice for *cda1Δ2Δ3Δ*, 10 mice for *chs3Δ*, and 10 mice for *chs3Δ::CHS3*. Virulence  
547 was determined using Mantel-Cox curve comparison with statistical significance  
548 determined by log-rank test. (\*\*\*,  $P < 0.001$ ).

549 **Figure 3. Mortality is not dependent on the viability of the fungi or mouse**  
550 **background:** (A) C57BL/6, (B) BALB/c, or (C) CBA/J mice were inoculated with  $10^7$  Heat-  
551 killed CFUs of each strain by intranasal inoculation. Survival of the animals was recorded  
552 as mortality of mice for 20 days post inoculation. Mice that lost 20% of the body weight at  
553 the time of inoculation or displayed signs of morbidity were considered ill and sacrificed.  
554 Data is cumulative of one experiment with 5 mice for KN99, and two experiments with 5  
555 mice for *chs3Δ* and *chs3Δ::CHS3* each for a total of 10 mice. Virulence was determined  
556 using Mantel-Cox curve comparison with statistical significance determined by log-rank  
557 test. (\*\*\*,  $P < 0.001$ ).

558 **Figure 4. Massive inflammatory response is triggered to *chs3Δ*:** C57BL/6 mice were  
559 inoculated with  $10^7$  Heat-killed CFUs of each strain by intranasal inoculation. At 8 hours  
560 post inoculation, the lungs were harvested, embedded, sectioned and processed for  
561 hematoxylin-eosin staining. HK KN99 inoculated mice (A-C) display a limited  
562 inflammatory response. HK *chs3Δ* inoculated mice (D-F) exhibit abundant foci of  
563 inflammation (black arrows) spread across the whole lung section consisting of a  
564 profound amount of mixed inflammatory infiltrates with enhanced presences of  
565 neutrophils (green arrows). HK *chs3Δ::CHS3* inoculated mice (G-I) displayed a similar

566 limited inflammatory response observed in the HK KN99 inoculated mice. Images are  
567 representative images of two independent experiments using three mice per group.

568 **Figure 5. *chs3*Δ induces a strong proinflammatory cytokine response:** C57BL/6 mice  
569 were inoculated with  $10^7$  Heat-killed CFUs of each strain by intranasal inoculation. At 8  
570 hours post inoculation, homogenates were prepared from the lungs of each group.  
571 Cytokine/chemokine responses were determined from the lung homogenates using the  
572 Bio-Plex Protein Array System. Data is cumulative of one experiment with 5 mice for PBS  
573 and KN99, and two experiments with 5 mice for *chs3*Δ and *chs3*Δ::*CHS3* each for a total  
574 of 10 mice experiments,  $\pm$  standard errors of the means (SEM). Each dot represents data  
575 from an individual mouse. (\*\*\*,  $P < 0.001$ )

576 **Figure 6. A significant increase in neutrophil recruitment in *chs3*Δ inoculated mice.**  
577 C57BL/6 mice were inoculated with  $10^7$  Heat-killed CFUs of each strain by intranasal  
578 inoculation. At 8 hours post inoculation, pulmonary leukocytes were isolated from the lungs  
579 of each group and subjected to flow cytometry analysis (see Supplemental Table 2 for  
580 antibodies and Supplemental Fig. 3 for gating strategy). (A) total cell number of leukocytes.  
581 (B) Total and (C) percent neutrophils (CD11b<sup>+</sup>/CD24<sup>+</sup>/Ly6G<sup>+</sup>/CD45<sup>+</sup>). Data is cumulative of  
582 one experiment with 5 mice for PBS and KN99, and two experiments with 5 mice for *chs3*Δ  
583 and *chs3*Δ::*CHS3* each for a total of 10 mice experiments,  $\pm$  standard errors of the means  
584 (SEM). Each dot represents data from an individual mouse. (\*\*\*,  $P < 0.001$ )

585 **Figure 7. Depletion of neutrophils protects *chs3*Δ inoculated mice:** (A) C57BL/6, (B)  
586 BALB/c, or (C) CBA/J mice were inoculated with  $10^7$  Heat-killed CFUs of each strain by  
587 intranasal inoculation. Prior to inoculation and throughout the experiment, mice were  
588 treated with isotype antibody or anti-Ly6G antibody. Survival of the animals was recorded

589 as mortality of mice for 20 days post inoculation. Mice that lost 20% of the body weight at  
590 the time of inoculation or displayed signs of morbidity were considered ill and sacrificed.  
591 Data is cumulative of two independent experiments with 5 mice for *chs3Δ* and  
592 *chs3Δ::CHS3* each for a total of 10 mice. Virulence was determined using Mantel-Cox  
593 curve comparison with statistical significance determined by log-rank test. (\*\*\*,  $P < 0.001$ ).

594

595

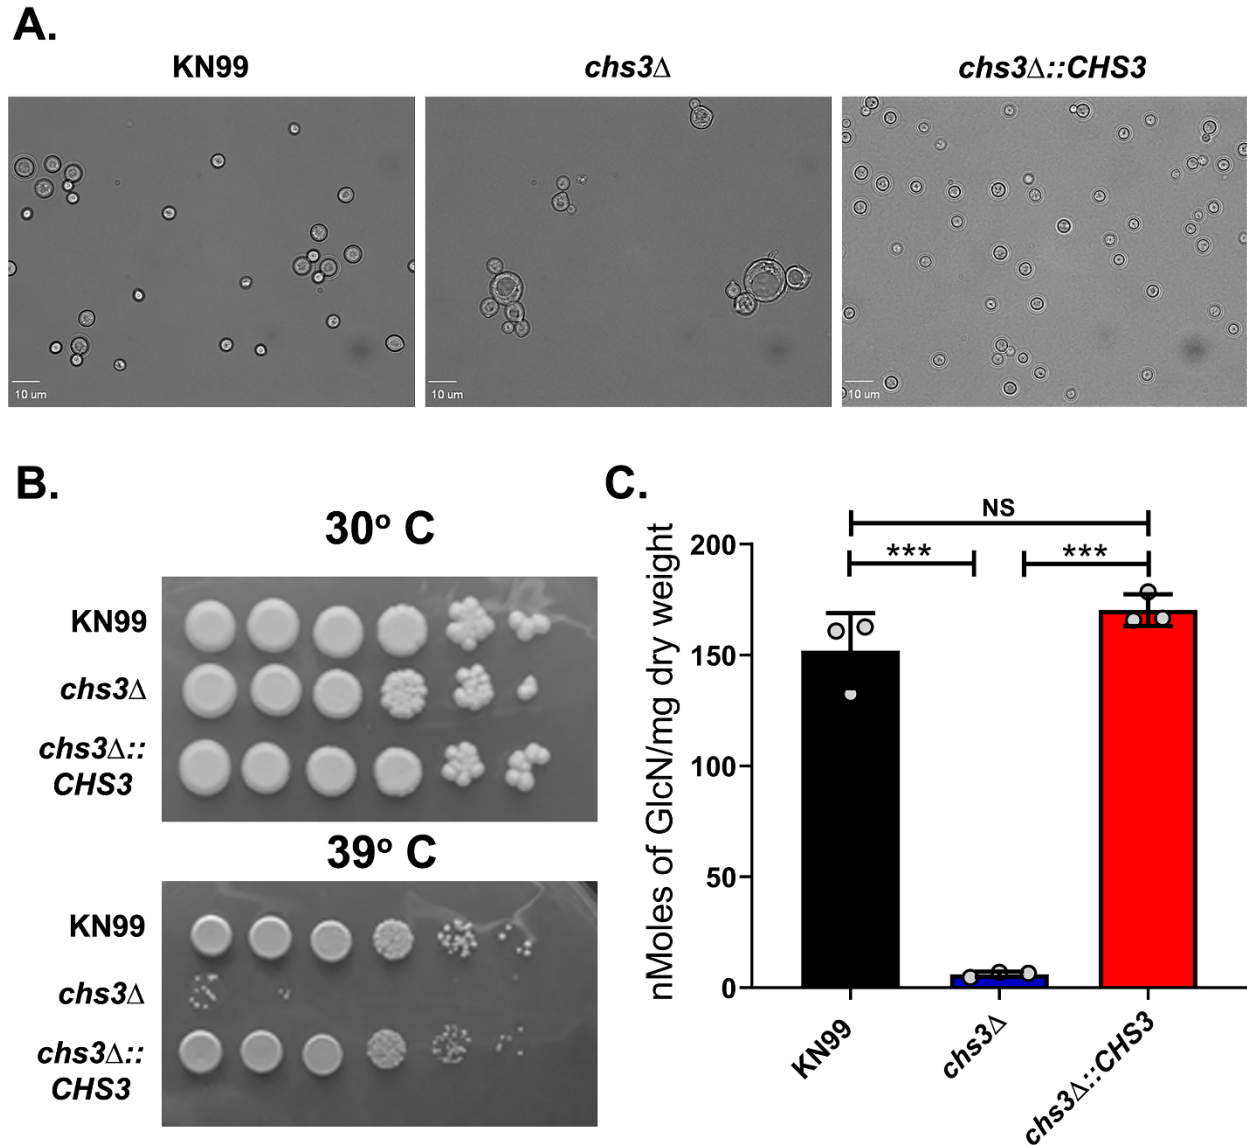

**Figure 1. Deletion and complementation of *C. neoformans* chitin synthase 3 (Chs3):** (A) For morphological analysis, cells were incubated for 2 days in YPD and diluted to an OD<sub>650</sub> of 0.2 with PBS. Five microliters each cell solution was spotted on to a clean glass slide and photographed at 40X. (B) Temperature sensitivity. Cultures were grown overnight in YPD then diluted to an OD<sub>650</sub> of 1.0. Tenfold serial dilutions were made in PBS and 3 $\mu$ l of each was plated. The plates were grown for 4 days at 30°C or 39°C. (C) Quantitative determination of cell wall chitosan by the MBTH assay. Cells were grown in YPD for two days, collected, washed and used for the assay. Data represents the average of three biological experiments  $\pm$  standard deviation (SD) and are expressed as nMoles of glucosamine per mg dry weight of yeast cells (\*\*\*,  $P < 0.001$ ).

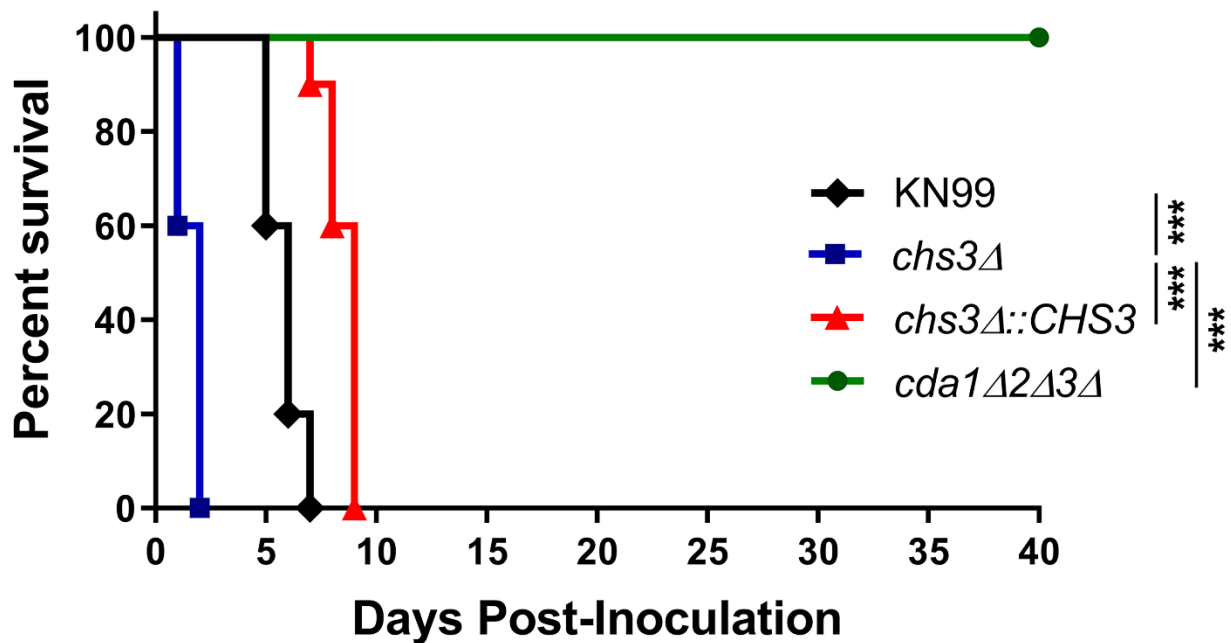

**Figure 2. Inoculation with the *chs3*Δ strain induces rapid mouse mortality:** C57BL/6 mice were infected with  $10^7$  live CFUs of each strain by intranasal inoculation. Survival of the animals was recorded as mortality of mice for 40 days post inoculation. Mice that lost 20% of the body weight at the time of inoculation or displayed signs of morbidity were considered ill and sacrificed. Data is representative of one experiment with 5 mice for KN99, 5 mice for *cda1*Δ2Δ3Δ, 10 mice for *chs3*Δ, and 10 mice for *chs3*Δ::CHS3. Virulence was determined using Mantel-Cox curve comparison with statistical significance determined by log-rank test. (\*\*\*,  $P < 0.001$ ).

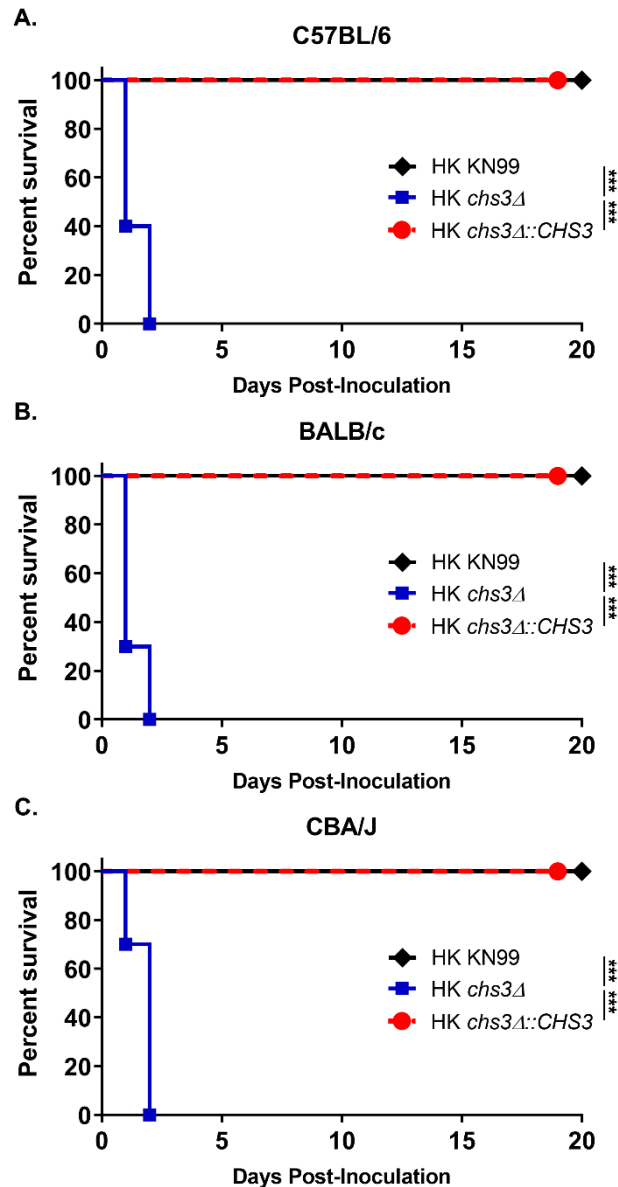

**Figure 3. Mortality is not dependent on the viability of the fungi or mouse background:** (A) C57BL/6, (B) BALB/c, or (C) CBA/J mice were inoculated with  $10^7$  Heat-killed CFUs of each strain by intranasal inoculation. Survival of the animals was recorded as mortality of mice for 20 days post inoculation. Mice that lost 20% of the body weight at the time of inoculation or displayed signs of morbidity were considered ill and sacrificed. Data is cumulative of one experiment with 5 mice for KN99, and two experiments with 5 mice for *chs3Δ* and *chs3Δ::CHS3* each for a total of 10 mice. Virulence was determined using Mantel-Cox curve comparison with statistical significance determined by log-rank test. (\*\*\*,  $P < 0.001$ ).

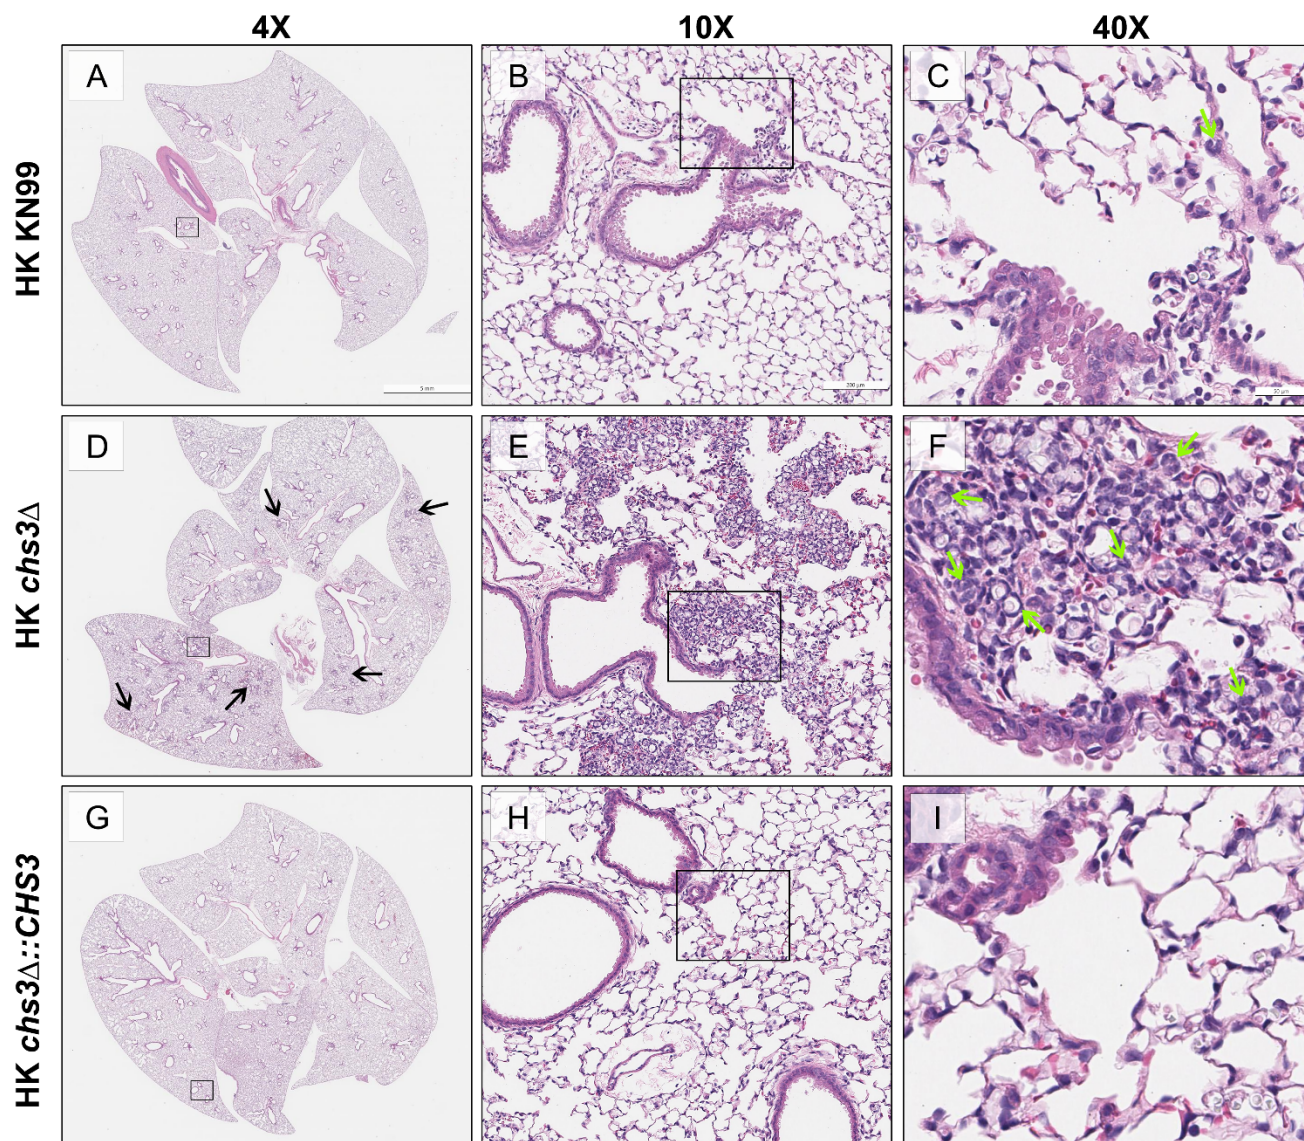

**Figure 4. Massive inflammatory response is triggered to *chs3*Δ:** C57BL/6 mice were inoculated with  $10^7$  Heat-killed CFUs of each strain by intranasal inoculation. At 8 hours post inoculation, the lungs were harvested, embedded, sectioned and processed for hematoxylin-eosin staining. HK KN99 inoculated mice (A-C) display a limited inflammatory response. HK *chs3*Δ inoculated mice (D-F) exhibit abundant foci of inflammation (black arrows) spread across the whole lung section consisting of a profound amount of mixed inflammatory infiltrates with enhanced presences of neutrophils (green arrows). HK *chs3*Δ::*CHS3* inoculated mice (G-I) displayed a similar limited inflammatory response observed in the HK KN99 inoculated mice. Images are representative images of two independent experiments using three mice per group.



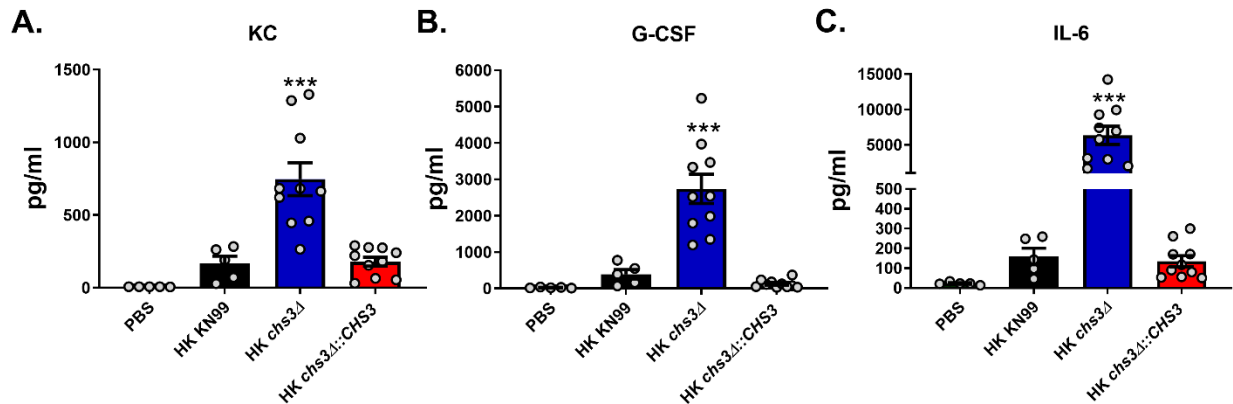

**Figure 5. *chs3*Δ induces a strong proinflammatory cytokine response:** C57BL/6 mice were inoculated with  $10^7$  Heat-killed CFUs of each strain by intranasal inoculation. At 8 hours post inoculation, homogenates were prepared from the lungs of each group. Cytokine/chemokine responses were determined from the lung homogenates using the Bio-Plex Protein Array System. Data is cumulative of one experiment with 5 mice for PBS and KN99, and two experiments with 5 mice for *chs3*Δ and *chs3*Δ::CHS3 each for a total of 10 mice experiments,  $\pm$  standard errors of the means (SEM). Each dot represents data from an individual mouse. (\*\*\*,  $P < 0.001$ )

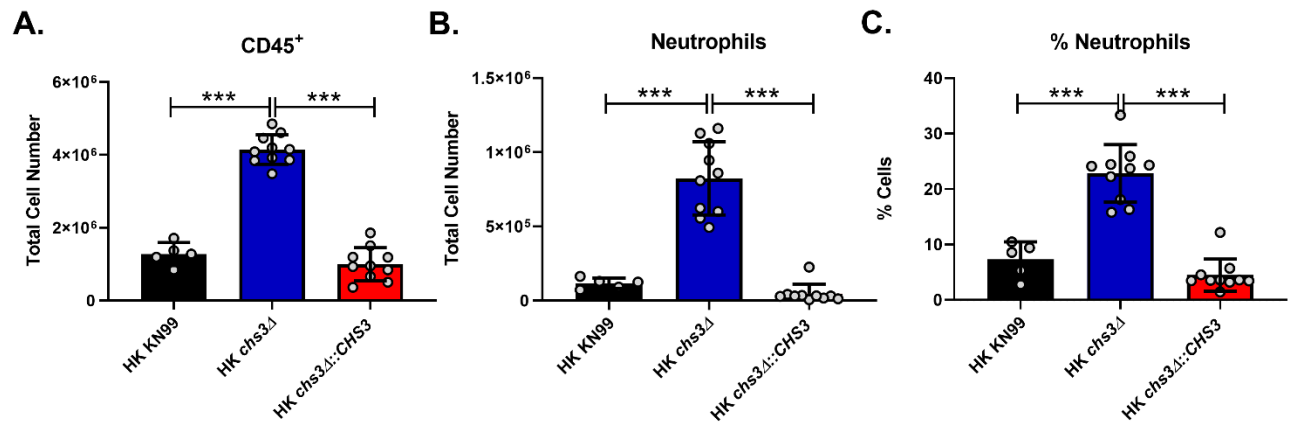

**Figure 6. A significant increase in neutrophil recruitment in *chs3*Δ inoculated mice.** C57BL/6 mice were inoculated with 10<sup>7</sup> Heat-killed CFUs of each strain by intranasal inoculation. At 8 hours post inoculation, pulmonary leukocytes were isolated from the lungs of each group and subjected to flow cytometry analysis (see Supplemental Table 2 for antibodies and Supplemental Fig. 3 for gating strategy). (A) total cell number of leukocytes. (B) Total and (C) percent neutrophils (CD11b<sup>+</sup>/CD24<sup>+</sup>/Ly6G<sup>+</sup>/CD45<sup>+</sup>). Data is cumulative of one experiment with 5 mice for PBS and KN99, and two experiments with 5 mice for *chs3*Δ and *chs3*Δ::*CHS3* each for a total of 10 mice experiments, ± standard errors of the means (SEM). Each dot represents data from an individual mouse. (\*\*\*, *P* < 0.001)

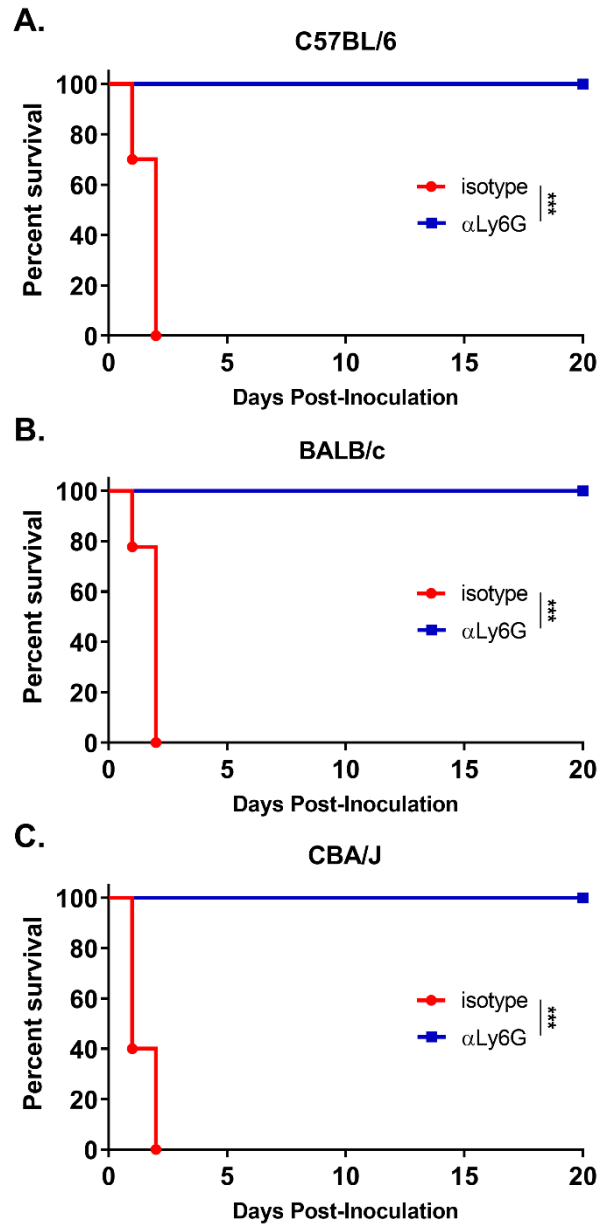

**Figure 7. Depletion of neutrophils protects *chs3* $\Delta$  inoculated mice:** (A) C57BL/6, (B) BALB/c, or (C) CBA/J mice were inoculated with  $10^7$  Heat-killed CFUs of each strain by intranasal inoculation. Prior to inoculation and throughout the experiment, mice were treated with isotype antibody or anti-Ly6G antibody. Survival of the animals was recorded as mortality of mice for 20 days post inoculation. Mice that lost 20% of the body weight at the time of inoculation or displayed signs of morbidity were considered ill and sacrificed. Data is cumulative of two independent experiments with 5 mice for *chs3* $\Delta$  and *chs3* $\Delta$ ::*CHS3* each for a total of 10 mice. Virulence was determined using Mantel-Cox curve comparison with statistical significance determined by log-rank test. (\*\*\*,  $P < 0.001$ ).

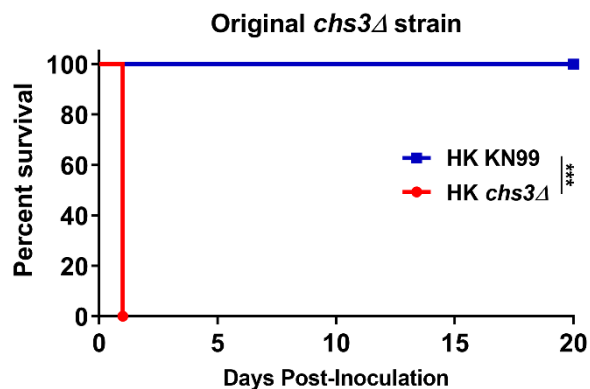

**Supplemental figure 1: The original *chs3Δ* strain also induces rapid mortality:** C57BL/6 mice were inoculated with  $10^7$  Heat-killed CFUs of each strain by intranasal inoculation. Survival of the animals was recorded as mortality of mice for 20 days post inoculation. Mice that lost 20% of the body weight at the time of inoculation or displayed signs of morbidity were considered ill and sacrificed. Data is representative of one experiment with 5 mice for each strain. Virulence was determined using Mantel-Cox curve comparison with statistical significance determined by log-rank test. (\*\*\*,  $P < 0.001$ ).

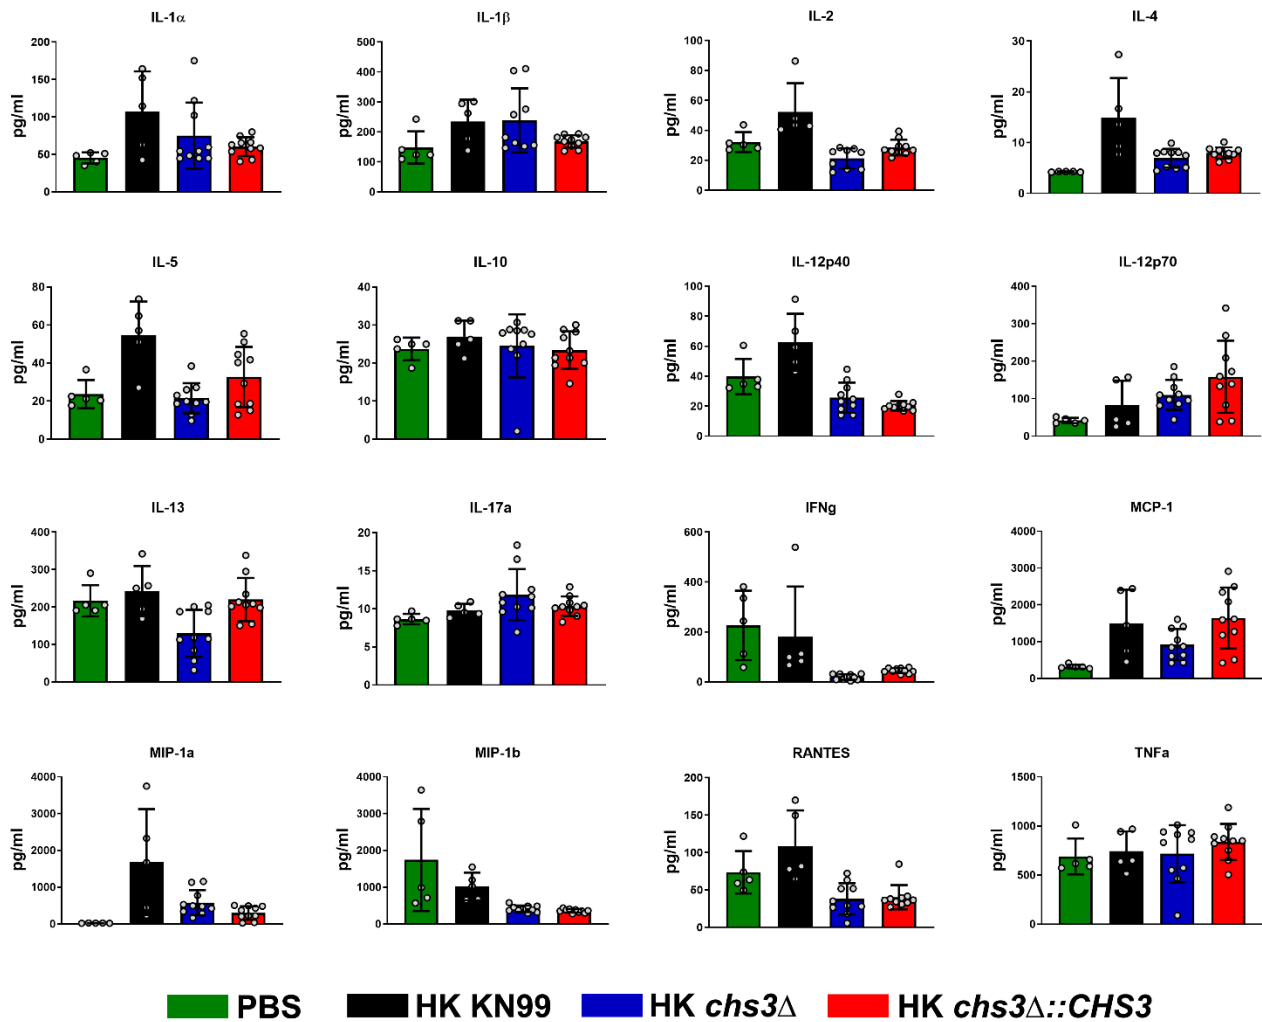

**Supplemental figure 2. Cytokine/chemokine analysis:** C57BL/6 mice were inoculated with  $10^7$  Heat-killed CFUs of each strain by intranasal inoculation. At 8 hours post inoculation, homogenates were prepared from the lungs of each group. Cytokine/chemokine responses were determined from the lung homogenates using the Bio-Plex Protein Array System. Data is cumulative of one experiment with 5 mice for PBS and KN99, and two experiments with 5 mice for *chs3*Δ and *chs3*Δ::*CHS3* each for a total of 10 mice experiments,  $\pm$  standard errors of the means (SEM). Each dot represents data from an individual mouse.

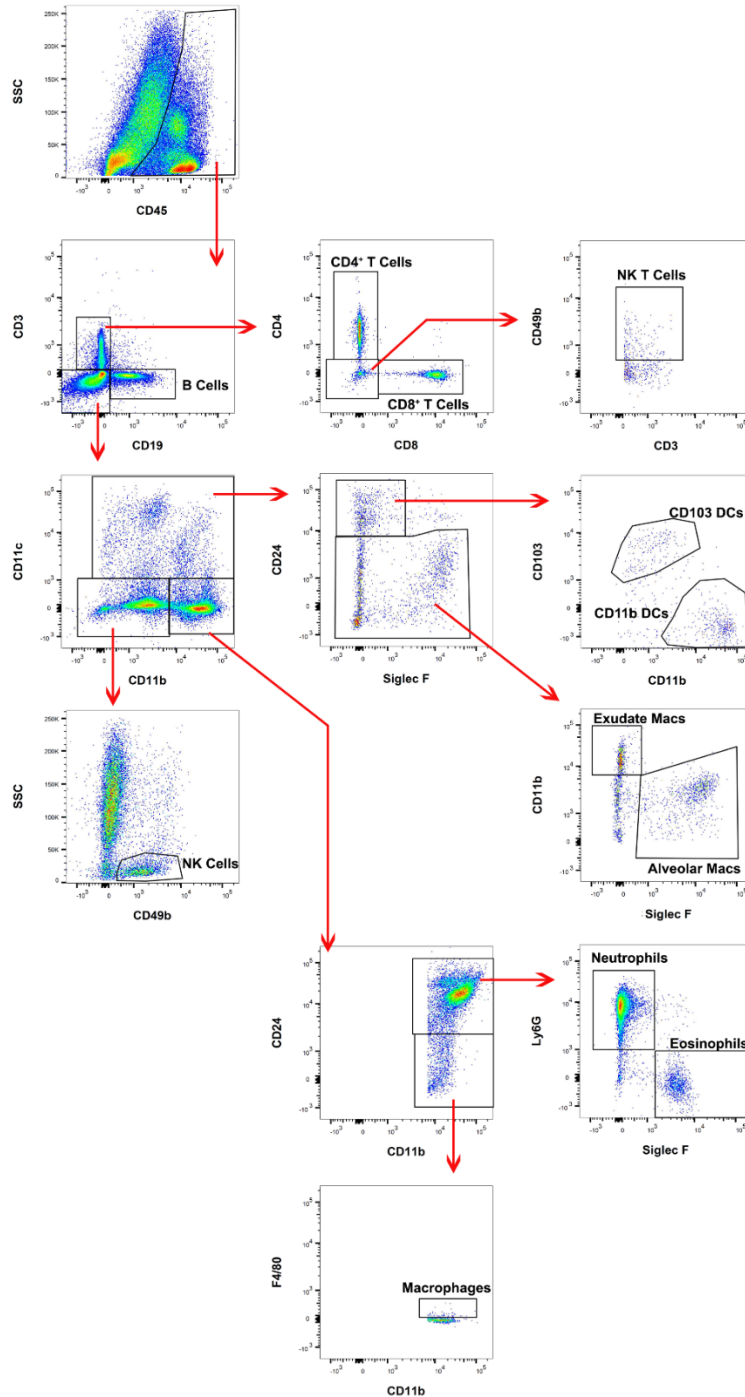

**Supplemental figure 3. Flow cytometry gating strategy.** Flow cytometry analysis of host leukocyte populations in C57BL/6 mice 8 hours post inoculation with  $10^7$  Heat-killed CFUs of *chs3Δ*. After separation based on physical properties to eliminate debris and doublets, dead cells were excluded by live/dead staining (not shown). CD45+ cells (leukocytes; top left) were subjected to analysis based on their expression of CD3, CD4, CD8a, CD11b, CD11c, CD19, CD24, CD49b, CD103, F4/80, Ly-6G, and Siglec F. The specific populations of cells identified are indicated on the flow plots.

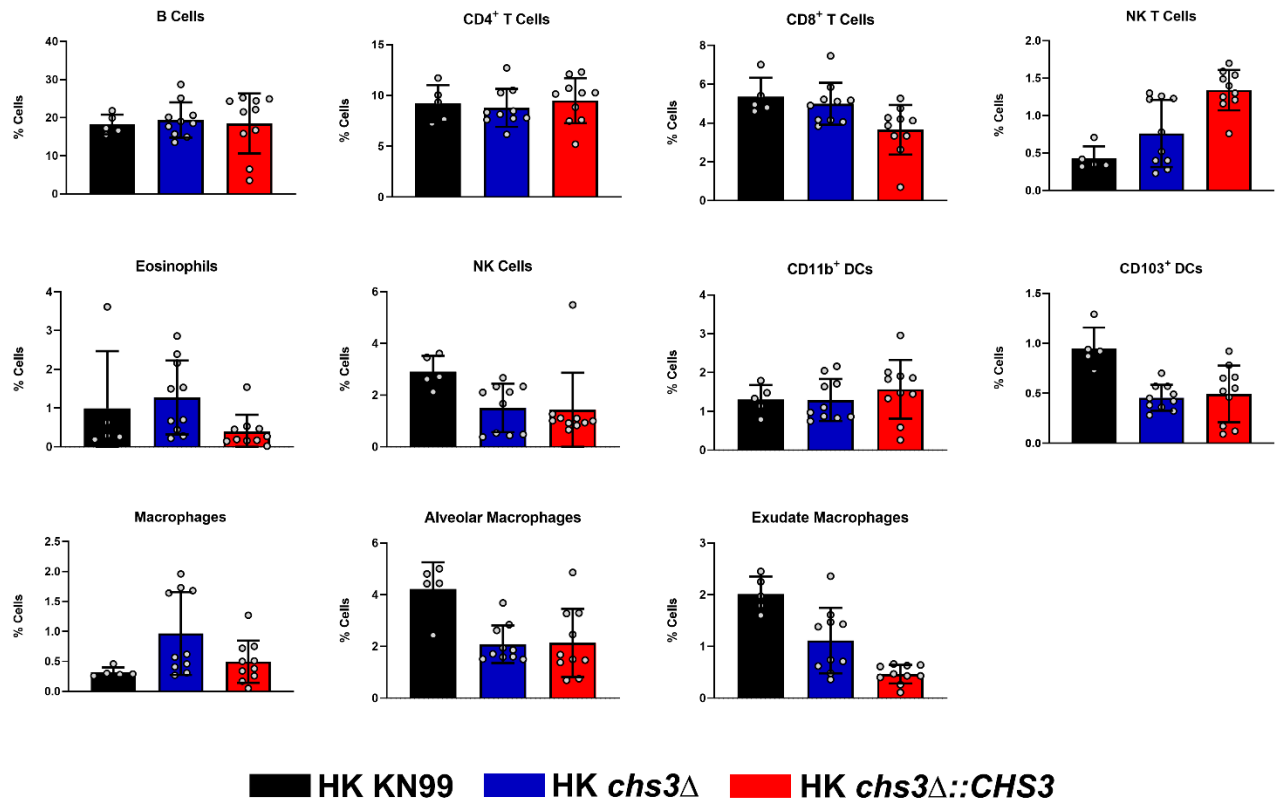

**Supplemental figure 4. Flow cytometry analysis:** C57BL/6 mice were inoculated with  $10^7$  Heat-killed CFUs of each strain by intranasal inoculation. At 8 hours post inoculation, pulmonary leukocytes were isolated from the lungs of each group and subjected to flow cytometry analysis. Data is cumulative of one experiment with 5 mice for PBS and KN99, and two experiments with 5 mice for *chs3*Δ and *chs3*Δ::*CHS3* each for a total of 10 mice experiments,  $\pm$  standard errors of the means (SEM). Each dot represents data from an individual mouse.

**Table S1. Primer used in this study.**

| <b>Primer</b> | <b>Sequence</b>                            |
|---------------|--------------------------------------------|
| Chs3-1        | CGTCAACCCAACCACATTC                        |
| Chs3-2        | CAGCTCTCAGATCACGTTTACCT                    |
| Chs3-3        | CGGAAATTGCTGCTCCCTAcaggaaacagctatgaccatg   |
| Chs3-4        | catggatcatagctgtttcctgTAGGGAGCAGCAATTTCCG  |
| Chs3-5        | cactggccgctgTTTTacaacGCGGATAAACATCCGTCAAAG |
| Chs3-6        | CTTTGACGGATGTTTATCCGCgttgtaaaacgacggccagtg |
| Chs3-7        | GAAAAGTTGAAGAAAAGGATCAATACC                |
| Chs3-8        | CTCTCAACTGTTTTAATCAACGAATG                 |
| Chs3-9        | GACACGTTCTGTTGGAGATGG                      |
| Chs3-10       | CTGTAAGTTCCTAACGCGAAACG                    |



**Table S2. Antibodies for flow analysis.**

| Antigen            | Clone    | Fluorophore      | Dilution | Company        |
|--------------------|----------|------------------|----------|----------------|
| CD3                | 17-A2    | APC-Cy7          | 1:250    | BioLegend      |
| CD4                | GK1.5    | BUV737           | 1:500    | BD Biosciences |
| CD8a               | 53-6.7   | BV650            | 1:125    | BD Biosciences |
| CD11b              | M1/70    | BV510            | 1:250    | BD Biosciences |
| CD11c              | N418     | PE               | 1:125    | Invitrogen     |
| CD16/CD32 Fc Block | 2.4G2    | (not applicable) | 1:500    | BD Biosciences |
| CD19               | 1D3      | BV786            | 1:125    | BD Biosciences |
| CD24               | M1/69    | PerCP-Cy5.5      | 1:125    | BD Biosciences |
| CD45               | 30-F11   | Pacific Blue     | 1:250    | BioLegend      |
| CD49b              | DX5      | PE-Cy7           | 1:250    | Invitrogen     |
| CD103              | 2E7      | Alexa488         | 1:125    | BioLegend      |
| F4/80              | BM8      | APC              | 1:250    | Invitrogen     |
| Ly6G               | 1A8      | BV711            | 1:125    | BD Biosciences |
| Siglec-F           | E50-2440 | PE-CF594         | 1:250    | BD Biosciences |
